# Supplementary material for: Unravelling the structural rearrangement of polymer colloidal crystals under dry sintering conditions
Source: Royal Society of Chemistry journal article supplement (doi:10.1039/c8sm01412d), 2018-01-01

## ELECTRONIC SUPPLEMENTARY INFORMATION

### Unravelling structural rearrangement of polymer colloidal crystals under dry sintering conditions

Alexey V. Zozulya,<sup>\*a</sup> Ivan A. Zaluzhnyy,<sup>b,c</sup> Nastasia Mukharamova,<sup>b</sup> Sergey Lazarev,<sup>b,d</sup> Janne-Mieke Meijer,<sup>e‡</sup> Ruslan P. Kurta,<sup>a</sup> Anatoly Shabalin,<sup>b§</sup> Michael Sprung,<sup>b</sup> Andrei V. Petukhov,<sup>e,f</sup> and Ivan A. Vartanyants<sup>b,c</sup>

<sup>a</sup> European XFEL GmbH, Holzkoppel 4, D-22869 Schenefeld, Germany; E-mail: alexey.zozulya@xfel.eu

<sup>b</sup> Deutsches Elektronen-Synchrotron DESY, Notkestraße 85, D-22607 Hamburg, Germany

<sup>c</sup> National Research Nuclear University MEPhI (Moscow Engineering Physics Institute), Kashirskoye ch. 31, 115409 Moscow, Russia

<sup>d</sup> National Research Tomsk Polytechnic University (TPU), Lenin Avenue 30, 634050 Tomsk, Russia

<sup>e</sup> Van 't Hoff Laboratory for Physical and Colloid Chemistry, Department of Chemistry and Debye Institute for Nanomaterials Science, Utrecht University, Padualaan 8, 3584 CH, The Netherlands

<sup>f</sup> Laboratory of Physical Chemistry, Department of Chemical Engineering and Chemistry and Institute for Complex Molecular Systems, Eindhoven University of Technology, P.O. Box 513, 5600 MB, Eindhoven, The Netherlands

**Figure S1** GTSAXS intensity profiles (dots) and fitting curves (lines) for the PS colloidal crystal samples (a) A, (b) B and (c) C at RT. For each sample the top and the bottom profiles refer to  $q_y$ - and  $q_z$ -directions (depicted as dashed lines in Figure 3 of the main text), respectively.  $q_y$ -profiles include diffraction peaks up to (220) order and  $q_z$ -profiles include peaks up to (003) order. Structural parameters deduced from fitting curves are summarized in Table 1 of the main text.

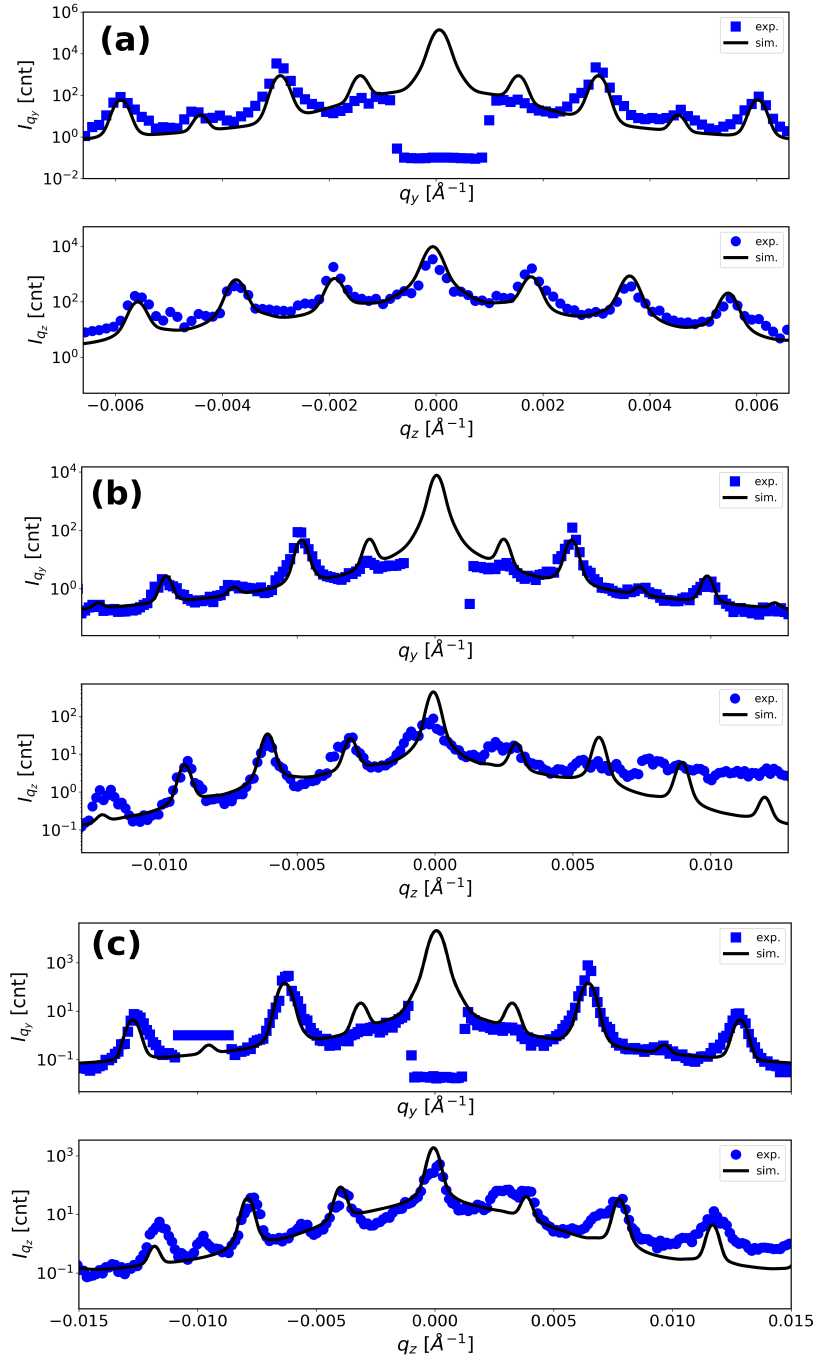

**Figure S2** Temperature dependences of GTSAXS peak positions, integrated intensities and widths of the PS colloidal crystal sample B for (a-c) in-plane and (d-f) out-of-plane directions.

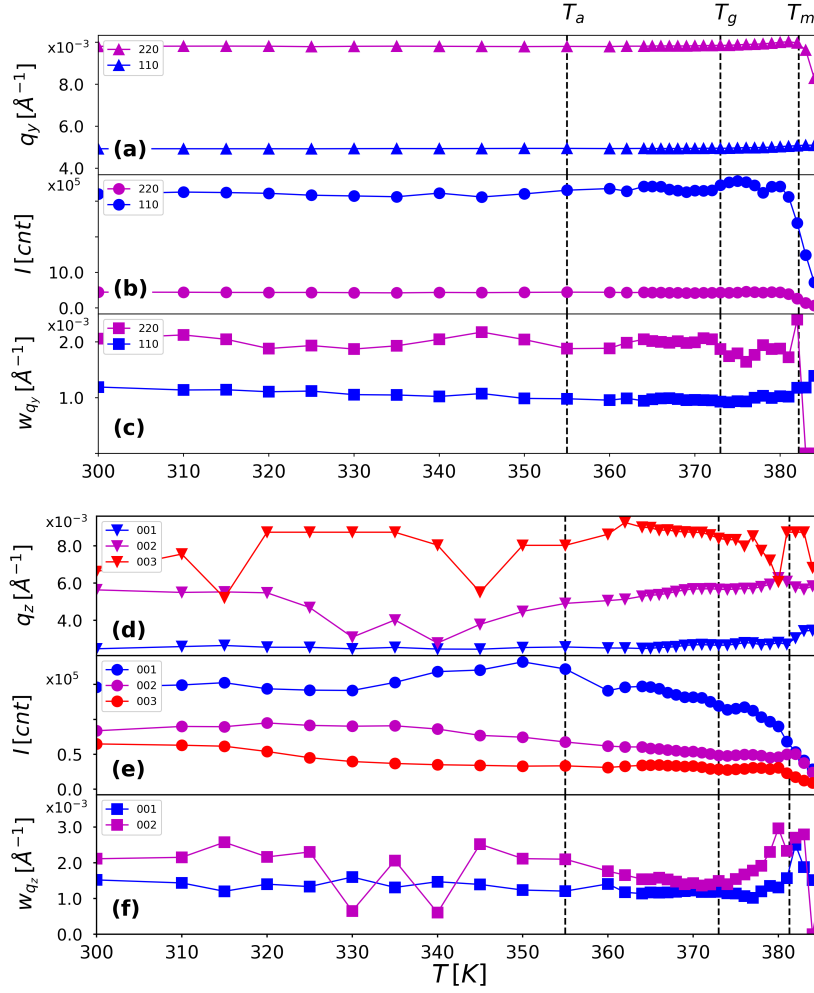

**Figure S3** Temperature dependences of GTSAXS peak positions, integrated intensities and widths of the PS colloidal crystal sample C for (a-c) in-plane and (d-f) out-of-plane directions.

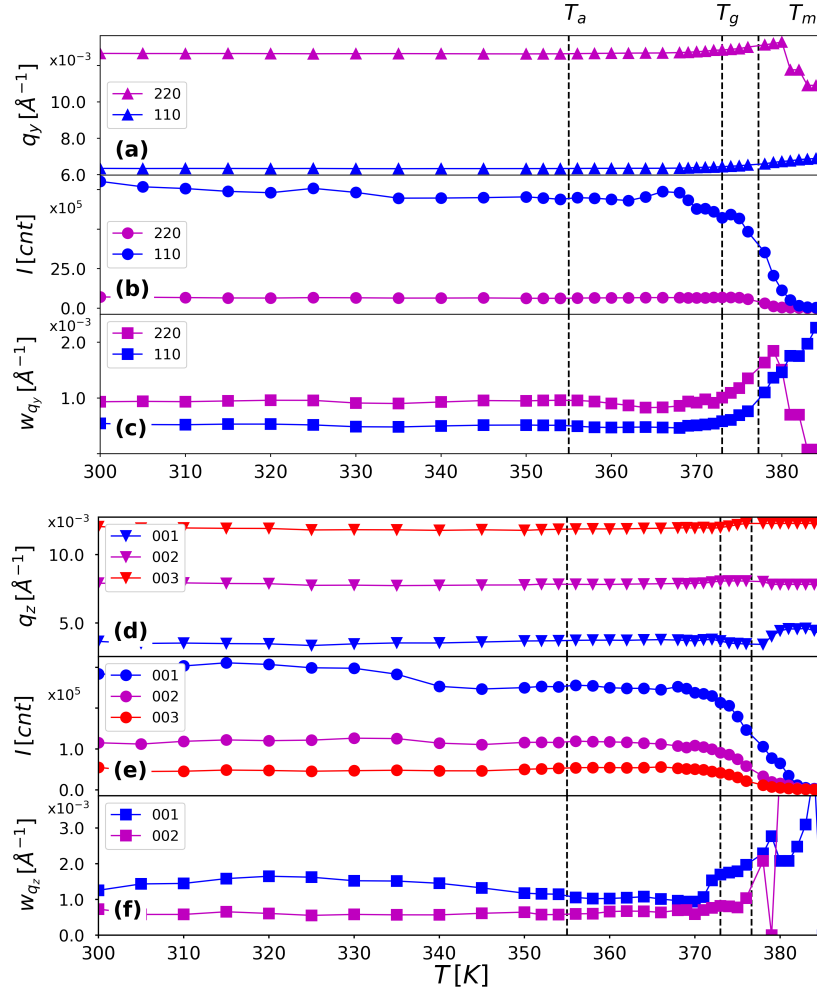

**Figure S4** Temperature dependences of (a) CSD sizes and (b) lattice deformation parameters for in-plane (blue filled dots) and out-of-plane (red open dots) directions of the sample C.

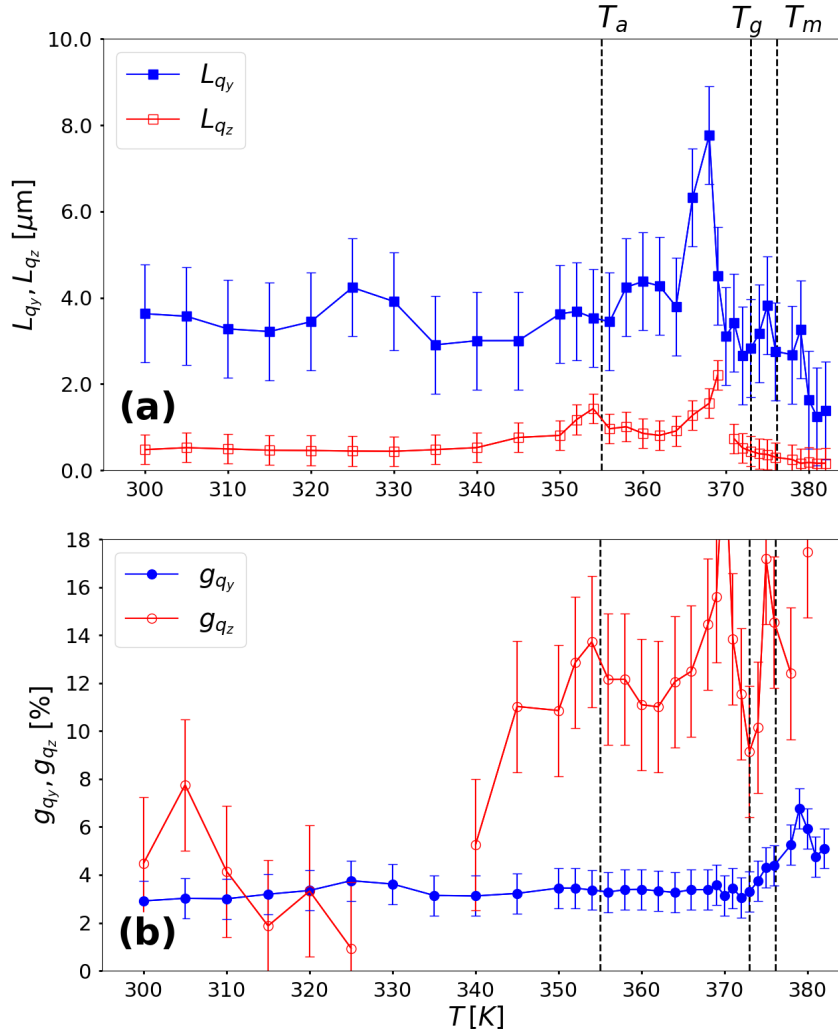

**Figure S5** Experimental (dots) and simulated (lines) GTSAXS intensity profiles for the PS colloidal crystal sample A at  $T = 376$  K. Calculated curves were obtained using the scattering functions of a single shape (dashed line) and 1:1 mixture of spheres and rhombic dodecahedrons (solid line).

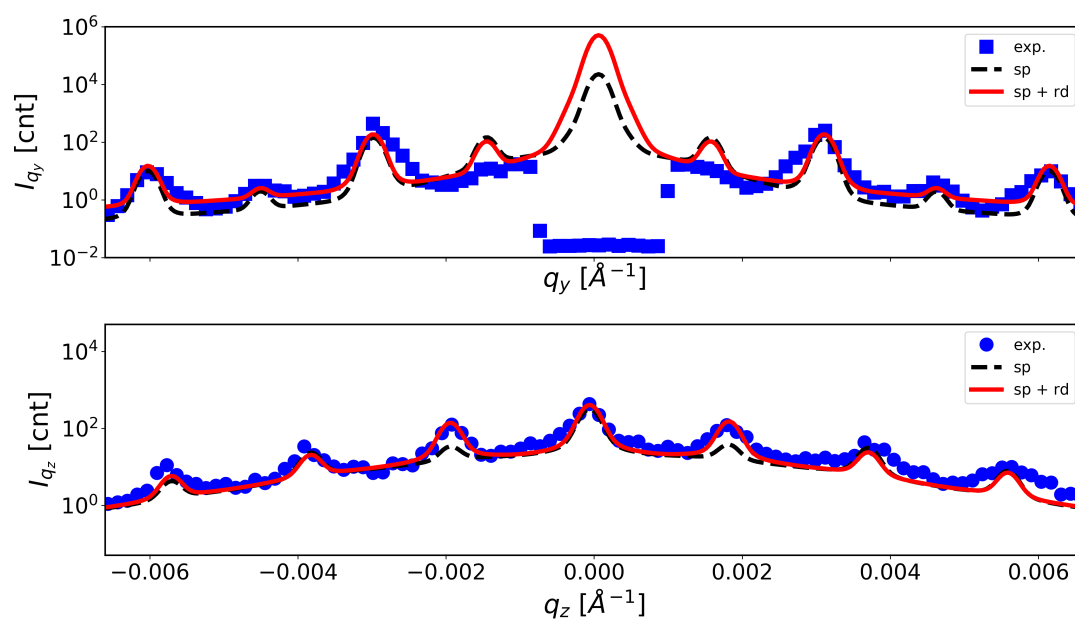

Supplement: c8sm01412d1.pdf [file c8sm01412d1.pdf]
